# Supplementary material
Source: publisher site journal article supplement (https://www.dovepress.com/article/582741)
Supplement: Supplementary file 1 [file 582741%20Revised%20Appendices%201-5.docx]

**Appendix 1.** Descriptive Statistics of Responses to eHEALS, ICL, ECL, and TSE Scales (N = 487)

| **Scale / Item** | **Mean ± SD** | **Agree (4 or 5)** | **Neutral (3)** | **Disagree (1 or 2)** |
| --- | --- | --- | --- | --- |
| **eHEALS – eHealth Literacy Scale** | | |  |  |
| 1. I know how to find helpful health resources on the Internet. | 4.10 ± 0.78 | 82.30% | 12.10% | 5.60% |
| 2. I know how to use the Internet to answer my health questions. | 4.05 ± 0.73 | 79.70% | 14.60% | 5.70% |
| 3. I know where to find reliable health resources online. | 3.94 ± 0.81 | 75.20% | 17.50% | 7.30% |
| 4. I can evaluate the quality of online health information. | 3.90 ± 0.75 | 73.90% | 18.70% | 7.40% |
| 5. I know how to use the health information I find online. | 3.85 ± 0.70 | 71.50% | 20.50% | 8.00% |
| 6. I feel confident in using online health information to make decisions. | 4.02 ± 0.69 | 78.00% | 16.40% | 5.60% |
| 7. I can tell high-quality from low-quality health resources online. | 3.88 ± 0.79 | 72.20% | 19.10% | 8.70% |
| 8. I have the skills needed to evaluate health information found online. | 3.87 ± 0.76 | 73.10% | 18.50% | 8.40% |
| **Mean (Scale)** | 3.95 ± 0.71 | 75.70% | 17.20% | 7.10% |
| **ICL / ECL – Intrinsic & Extraneous Cognitive Load Scale** | | | | |
| 1. The AI information was complex and difficult to understand. | 3.30 ± 0.89 | 44.80% | 32.10% | 23.10% |
| 2. The AI explanations required a lot of mental effort. | 3.25 ± 0.91 | 42.30% | 34.90% | 22.80% |
| 3. The amount of information was overwhelming. | 3.10 ± 0.85 | 38.50% | 36.10% | 25.40% |
| 4. Understanding the AI advice demanded high concentration. | 3.22 ± 0.82 | 41.10% | 38.80% | 20.10% |
| 5. It was hard to remember all the information provided. | 3.15 ± 0.77 | 39.80% | 39.20% | 21.00% |
| 6. The AI messages contained unnecessary or confusing details. | 3.08 ± 0.81 | 35.70% | 37.60% | 26.70% |
| 7. The AI output was too long or detailed to process easily. | 3.13 ± 0.84 | 36.90% | 38.20% | 24.90% |
| **Mean (Scale)** | 3.18 ± 0.80 | 39.90% | 36.70% | 23.40% |
| **TSE – Technology Self-Efficacy Scale** | | |  |  |
| 1. I feel confident using digital technologies to find health information. | 4.21 ± 0.71 | 84.40% | 11.30% | 4.30% |
| 2. I can evaluate whether online health information is reliable. | 4.09 ± 0.74 | 81.70% | 13.00% | 5.30% |
| 3. I am confident in troubleshooting problems while using AI systems. | 3.98 ± 0.79 | 75.90% | 17.20% | 6.90% |
| 4. I can compare AI information with other sources. | 4.08 ± 0.70 | 80.30% | 14.00% | 5.70% |
| 5. I can identify errors or inconsistencies in AI-generated advice. | 3.95 ± 0.77 | 74.80% | 17.90% | 7.30% |
| 6. I am confident using new health apps without help. | 4.16 ± 0.68 | 82.90% | 13.40% | 3.70% |
| 7. I can explain to others how to use AI tools for health information. | 4.05 ± 0.73 | 79.60% | 14.90% | 5.50% |
| 8. I have sufficient skills to assess AI health tools. | 4.08 ± 0.66 | 81.00% | 15.00% | 4.00% |
| **Mean (Scale)** | 4.07 ± 0.67 | 80.10% | 14.60% | 5.30% |

**Notes:**

- eHEALS = eHealth Literacy Scale; ICL = Intrinsic Cognitive Load; ECL = Extraneous Cognitive Load; TSE = Technology Self-Efficacy.
- “Agree” represents respondents selecting 4 or 5 on 5-point scales or 5–7 on 7-point scales.
- Percentages may not total 100 % due to rounding.

**Appendix 2.** Descriptive Statistics of Responses to Verification and Following Intention Scales (N = 487)

| **Scale / Item** | **Mean ± SD** | **Agree (4 or 5)** | **Neutral (3)** | **Disagree (1 or 2)** |
| --- | --- | --- | --- | --- |
| **Verification Intention (Verification of AI-Generated Advice)** | | | | |
| 1. I would check the AI’s health advice with another reliable source before acting. | 4.21 ± 0.72 | 86.50% | 9.00% | 4.50% |
| 2. I would confirm AI-generated health information with a healthcare professional. | 4.18 ± 0.74 | 84.60% | 10.50% | 4.90% |
| 3. I would verify the accuracy of AI health advice before applying it to myself. | 3.91 ± 0.77 | 73.20% | 18.10% | 8.70% |
| **Mean (Scale)** | 4.10 ± 0.74 | 81.40% | 12.50% | 6.10% |
| **Following Intention (Following AI-Generated Advice)** | | | |  |
| 1. I would follow the AI’s health advice if it appears reasonable. | 3.43 ± 0.79 | 54.20% | 27.70% | 18.10% |
| 2. I would rely on AI health advice without consulting other sources if it sounds correct. | 3.19 ± 0.81 | 43.80% | 31.20% | 25.00% |
| 3. I would use the AI’s health recommendation as my primary guidance. | 3.20 ± 0.79 | 44.30% | 33.00% | 22.70% |
| **Mean (Scale)** | 3.27 ± 0.76 | 47.40% | 30.60% | 22.00% |

**Notes:**

- Higher mean scores in the Verification Intention scale indicate stronger preference for confirming AI-generated health information before acting.
- Higher mean scores in the Following Intention scale indicate greater inclination to rely directly on AI advice.
- Percentages may not sum exactly to 100 % due to rounding.

**Appendix 3.** Summary of Scale Reliability and Validity Indices (N = 487)

| **Construct** | **No. of Items** | **Cronbach’s α** | **Composite Reliability (CR)** | **Average Variance Extracted (AVE)** | **√AVE** | **Inter-Construct Correlations** |
| --- | --- | --- | --- | --- | --- | --- |
|  |  |  |  |  |  | **1 = eHEALS**, **2 = Cognitive Load**, **3 = TSE**, **4 = Verification**, **5 = Following** |
| **1. eHealth Literacy (eHEALS)** | 8 | 0.89 | 0.91 | 0.55 | **0.74** | – |
| **2. Cognitive Load (ICL + ECL)** | 7 | 0.86 | 0.88 | 0.53 | **0.73** | r₁₂ = –0.41 ** |
| **3. Technology Self-Efficacy (TSE)** | 8 | 0.92 | 0.93 | 0.57 | **0.76** | r₁₃ = 0.44 **, r₂₃ = –0.38 ** |
| **4. Verification Intention (VI)** | 3 | 0.88 | 0.9 | 0.6 | **0.77** | r₁₄ = 0.56 **, r₂₄ = –0.43 **, r₃₄ = 0.41 ** |
| **5. Following Intention (FI)** | 3 | 0.84 | 0.87 | 0.59 | **0.77** | r₁₅ = –0.33 **, r₂₅ = 0.46 **, r₃₅ = –0.29 **, r₄₅ = –0.54 ** |

- **Notes:**• All reliability coefficients exceeded the recommended threshold of 0.70, indicating satisfactory internal consistency.
  • Composite Reliability (CR) values greater than 0.70 and Average Variance Extracted (AVE) values greater than 0.50 demonstrated adequate convergent validity.
  • Bold diagonal values (√AVE) represent the square root of the Average Variance Extracted for each construct.
  • The square root of each AVE (√AVE) was greater than the corresponding inter-construct correlations, satisfying the Fornell–Larcker criterion for discriminant validity.
  • ** indicates correlations significant at p < 0.01 (two-tailed).

**Appendix 4.** Model Fit Summary and Standardized Structural Equation Model (SEM) Path Estimates (N = 487)

| **Model** | **χ²** | **df** | **χ²/df** | **CFI** | **TLI** | **RMSEA (90 % CI)** | **SRMR** | **Fit Evaluation** |
| --- | --- | --- | --- | --- | --- | --- | --- | --- |
| Measurement Model | 406.12 | 214 | 1.9 | 0.952 | 0.944 | 0.043 (0.037 – 0.050) | 0.038 | Good fit |
| Structural Model | 454.85 | 237 | 1.92 | 0.947 | 0.937 | 0.044 (0.038 – 0.051) | 0.041 | Excellent fit |

Criteria for acceptable fit: χ²/df < 3.0; CFI ≥ 0.90; TLI ≥ 0.90; RMSEA ≤ 0.08; SRMR ≤ 0.08.

**Standardized Path Coefficients (Direct, Indirect, and Moderated Effects)**

| **Hypothesis** | **Path** | **β (Standardized)** | **SE** | **95 % CI** | **p-value** | **Result** |
| --- | --- | --- | --- | --- | --- | --- |
| **Direct Effects** | |  |  |  |  |  |
| H1 | eHealth Literacy → Verification Intention | 0.36 | 0.07 | (0.21, 0.48) | < 0.001 | Accepted |
| H2 | eHealth Literacy → Following Intention | –0.18 | 0.06 | (–0.28, –0.04) | < 0.001 | Accepted |
| H3 | Cognitive Load → Verification Intention | –0.27 | 0.07 | (–0.36, –0.10) | < 0.001 | Accepted |
| H4 | Cognitive Load → Following Intention | 0.29 | 0.08 | (0.11, 0.42) | < 0.001 | Accepted |
| H6 | Technology Self-Efficacy → Verification Intention | 0.25 | 0.06 | (0.10, 0.35) | < 0.001 | Accepted |
| H7 | Technology Self-Efficacy → Following Intention | –0.16 | 0.06 | (–0.25, –0.02) | 0.001 | Accepted |
| **Indirect Effect** | |  |  |  |  |  |
| H5 | eHealth Literacy → Cognitive Load → Verification Intention | –0.09 | 0.03 | (–0.15, –0.03) | 0.001 | Accepted (Mediation) |
| **Moderation Effect** | |  |  |  |  |  |
| H8 | Cognitive Load × Technology Self-Efficacy → Verification Intention | 0.1 | 0.04 | (0.02, 0.17) | 0.01 | Accepted (Moderation) |

**Model Summary**

- **R² (Verification Intention)** = 0.56 → 56 % of variance explained
- **R² (Following Intention)** = 0.44 → 44 % of variance explained
- **Bootstrapping:** 2,000 resamples used for confidence intervals.
- **All paths significant (p < 0.05).**

**Appendix 5.** Full Survey Items

All items were rated on 5- or 7-point Likert-type scales as indicated.

| **Construct / Source** | **Item (English)** | **Scale** |
| --- | --- | --- |
| **eHealth Literacy1** | 1. I know how to find helpful health resources on the Internet. | 1 = Strongly Disagree → 5 = Strongly Agree |
| 2. I know how to use the Internet to answer my health questions. |  |
| 3. I know what health resources are available on the Internet. |  |
| 4. I know where to find helpful health resources on the Internet. |  |
| 5. I know how to use the health information I find online. |  |
| 6. I have the skills I need to evaluate the health resources I find online. |  |
| 7. I can tell high-quality health resources from low-quality ones on the Internet. |  |
| 8. I feel confident in using information from the Internet to make health decisions. |  |
| **Cognitive Load5** | 1. The information provided by the AI system was complex and difficult to understand. | 1 = Strongly Disagree → 7 = Strongly Agree |
| 2. The AI explanations required a lot of mental effort to follow. |  |
| 3. The amount of information provided by the AI was overwhelming. |  |
| 4. Understanding the AI advice demanded high concentration. |  |
| 5. I found it hard to remember all the information provided by the AI. |  |
| 6. The AI messages contained unnecessary or confusing details. |  |
| 7. The AI output was too long or detailed to process easily. |  |
| **Technology Self-Efficacy8** | 1. I feel confident using digital technologies to search for health information. | 1 = Strongly Disagree → 5 = Strongly Agree |
| 2. I can evaluate whether online health information is reliable. |  |
| 3. I am confident in troubleshooting problems while using AI systems. |  |
| 4. I can compare information from AI systems with other credible sources. |  |
| 5. I can identify errors or inconsistencies in AI-generated advice. |  |
| 6. I am confident using new digital health applications without help. |  |
| 7. I can explain to others how to use AI tools for health information. |  |
| 8. I believe I have sufficient skills to assess the usefulness of AI health tools. |  |
| **Verification Intention (Developed)** | 1. I would check the AI’s health advice with another reliable source before acting. | 1 = Strongly Disagree → 5 = Strongly Agree |
| 2. I would confirm AI-generated health information with a healthcare professional. |  |
| 3. I would verify the accuracy of AI health advice before applying it to myself. |  |
| **Following Intention (Developed)** | 1. I would follow the AI’s health advice if it appears reasonable. | 1 = Strongly Disagree → 5 = Strongly Agree |
| 2. I would rely on AI health advice without consulting other sources if it sounds correct. |  |
| 3. I would use the AI’s health recommendation as my primary guidance. |  |
